# Supplementary material
Source: Springer Nature journal article supplement (https://www.springermedizin.de/resource/supplementary/12901_2012_84_MOESM4_ESM.pdf/9515208)

VSS VER Subscale (score range: 0 - 76)

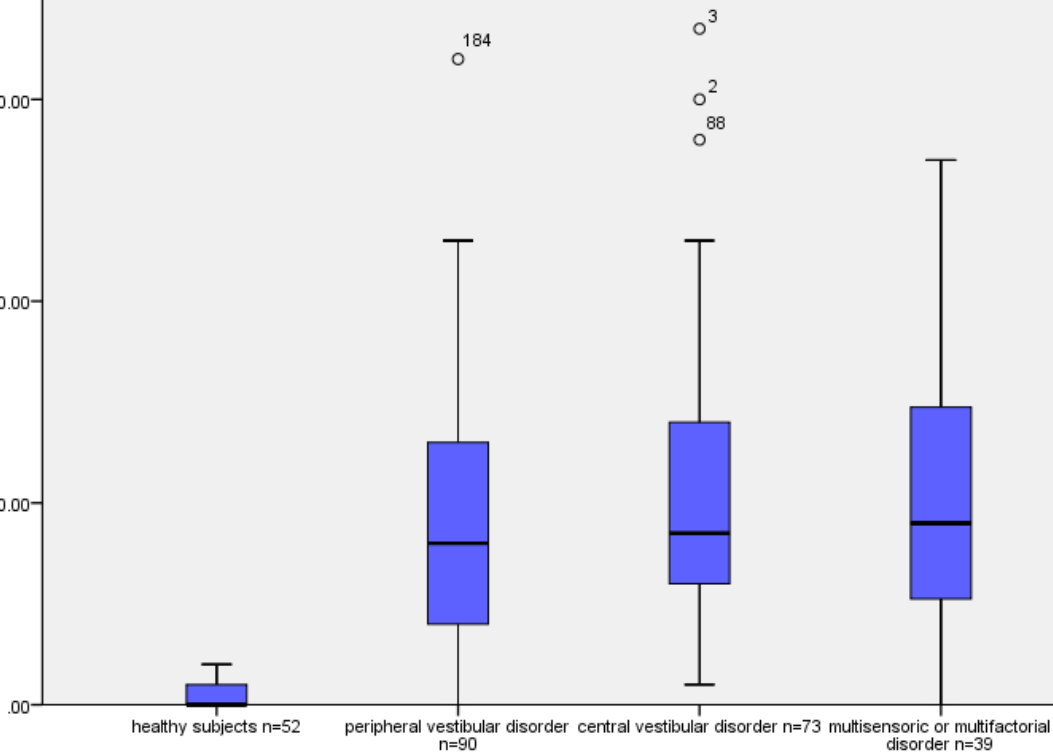

Groups of diagnosis

Supplement: MOESM4 [file 9515208]
